# Supplementary material for: Type 2 diabetes progression differently affects endothelial function and vascular contractility in the aorta and the pulmonary artery
Source: PubMed Central journal article supplement (PMC7960698; doi:10.1038/s41598-021-85606-7), 2021-03-15

**Type 2 diabetes progression differently affects endothelial function and vascular contractility in the aorta and the pulmonary artery**

Bernardete F. Melo<sup>1,\*</sup>, Jesus Prieto-Lloret<sup>1,\*</sup>, Marlene D. Cabral<sup>1</sup>, Fatima O. Martins<sup>1</sup>, Inês B. Martins<sup>1</sup>, Joana F. Sacramento<sup>1</sup>, Pedro Ruivo<sup>2</sup>, Tânia Carvalho<sup>2</sup> and Silvia V. Conde<sup>1</sup>

## Supplementary Data

**Table S1 – Composition of Standard diet**

| <b>Composition</b>             | <b>%</b>    |
|--------------------------------|-------------|
| <b>Proximate Analysis</b>      |             |
| Moisture                       | 10.00       |
| Crude Oil                      | 4.16        |
| Crude Protein                  | 21.86       |
| Crude Fibre                    | 4.33        |
| Ash                            | 7.89        |
| Nitrogen Free Extract          | 51.24       |
| <b>Amino Acids</b>             |             |
| Arginine                       | 1.39        |
| Histidine                      | 0.54        |
| Isoleucine                     | 0.96        |
| Leucine                        | 1.81        |
| Lysine                         | 1.30        |
| Phenylalanine                  | 1.20        |
| Tyrosine                       | 0.85        |
| Alanine                        | 0.27        |
| Aspartic Acid                  | 1.34        |
| Glutamic Acid                  | 4.30        |
| Proline                        | 1.53        |
| Serine                         | 0.98        |
| <b>Fatty acids</b>             |             |
| Lauric                         | 0.05        |
| Myristic                       | 0.17        |
| Palmitic                       | 0.37        |
| Stearic                        | 0.10        |
| Myristoleic                    | 0.01        |
| Palmitoleic                    | 0.09        |
| Oleic                          | 1.00        |
| Linoleic                       | 1.25        |
| Linolenic                      | 0.17        |
| Arachidonic                    | 0.12        |
| <b>Fiber and Carbohydrates</b> |             |
| Total Dietary Fibre            | 15.70       |
| Pectin                         | 1.47        |
| Hemicellulose                  | 9.33        |
| Cellulose                      | 4.04        |
| Lignin                         | 1.50        |
| Starch                         | 33.61       |
| Sugar                          | 5.84        |
| <b>Energy</b>                  |             |
| Gross Energy                   | 15.10 MJ/kg |
| Digestible Energy              | 12.27 MJ/kg |

|                           |                |
|---------------------------|----------------|
| Metabolizable energy      | 11.24 MJ/kg    |
| Atwater Fuel Energy (AFE) | 13.79 MJ/kg    |
| AFE from Oil              | 11.35          |
| AFE from Protein          | 26.51          |
| AFE from Carbohydrate     | 62.13          |
| <b>Minerals</b>           |                |
| Calcium                   | 1.24           |
| Phosphorus                | 0.80           |
| Potassium                 | 0.78           |
| Magnesium                 | 0.28           |
| Sodium                    | 0.24           |
| Chloride                  | 0.36           |
| Fluorine                  | 8.53 mg/kg     |
| Iron                      | 161.01 mg/kg   |
| Zinc                      | 46.90 mg/kg    |
| Manganese                 | 101.71 mg/kg   |
| <b>Vitamins</b>           |                |
| Vitamin A                 | 42522.66 IU/kg |
| Vitamin D-3 (added)       | 4369.41 IU/kg  |
| Vitamin E                 | 171.70 IU/kg   |
| Vitamin K                 | 40.72 mg/kg    |
| Thiamin                   | 49.77 mg/kg    |
| Riboflavin                | 37.74 mg/kg    |

**Table S2 – Composition of 60% lipid-rich diet**

| <b>Composition</b>                | <b>%</b>           |
|-----------------------------------|--------------------|
| <b>Protein</b>                    | <b>23.1</b>        |
| Arginine                          | 0.90               |
| Histidine                         | 0.67               |
| Isoleucine                        | 1.24               |
| Leucine                           | 2.24               |
| Lysine                            | 1.88               |
| Phenylalanine                     | 1.24               |
| Tyrosine                          | 1.31               |
| Threonine                         | 1.0                |
| Valine                            | 1.47               |
| Aspartic Acid                     | 1.66               |
| Glutamic Acid                     | 5.28               |
| Proline                           | 3.04               |
| Serine                            | 1.43               |
| <b>Fat</b>                        | <b>34.9</b>        |
| Cholesterol                       | 301 ppm            |
| Linoleic Acid                     | 4.70               |
| Linolenic Acid                    | 0.39               |
| Arachidonic Acid                  | 0.06               |
| Omega-3 Fatty Acids               | 0.39               |
| Total Saturated Fatty A           | 13.68              |
| Total Monounsaturated Fatty Acids | 14.00              |
| Polyunsaturated Fatty Acids       | 5.15               |
| <b>Fiber (max)</b>                | <b>6.5</b>         |
| <b>Carbohydrates</b>              | <b>25.9</b>        |
| <b>Energy</b>                     | <b>5.10 kcal/g</b> |
| <b>From:</b>                      | <b>%</b>           |
| Protein                           | 18.1               |
| Fat                               | 61.6               |
| <b>Minerals</b>                   |                    |
| Calcium                           | 0.79               |
| Phosphorus                        | 0.59               |
| Potassium                         | 0.77               |
| Magnesium                         | 0.07               |
| Sodium                            | 0.15               |
| Chloride                          | 0.25               |
| Fluorine                          | 1.2 ppm            |
| Iron                              | 65 ppm             |
| Zinc                              | 46 ppm             |

|                     |            |
|---------------------|------------|
| Manganese           | 76 ppm     |
| <b>Vitamins</b>     |            |
| Vitamin A           | 5.2 IU/g   |
| Vitamin D-3 (added) | 1.3 IU/g   |
| Vitamin E           | 67.2 IU/kg |
| Vitamin K           | 0.65 ppm   |
| Thiamin             | 6.2 ppm    |
| Riboflavin          | 8.7 ppm    |
| Niacin              | 39 ppm     |
| Pantothenic Acid    | 21 ppm     |

# Supplementary Data - Representative Western Blot images

## Figure 3 b

PGF<sub>2α</sub> receptor

Aorta

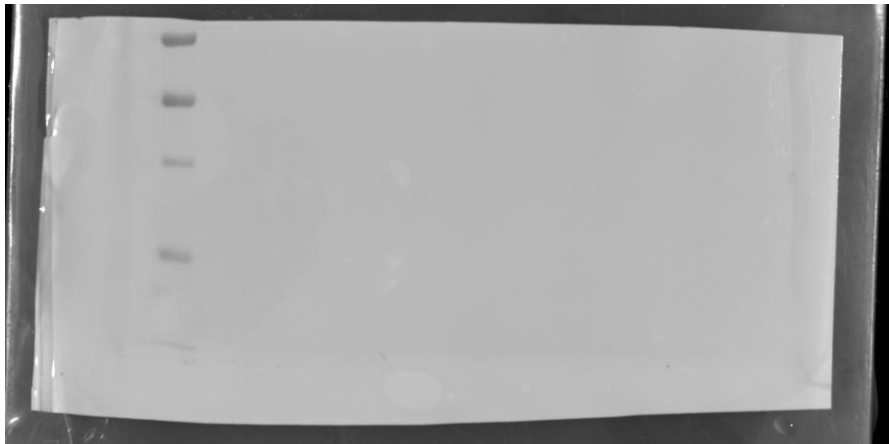

PGF<sub>2α</sub>  
receptor  
60KDa

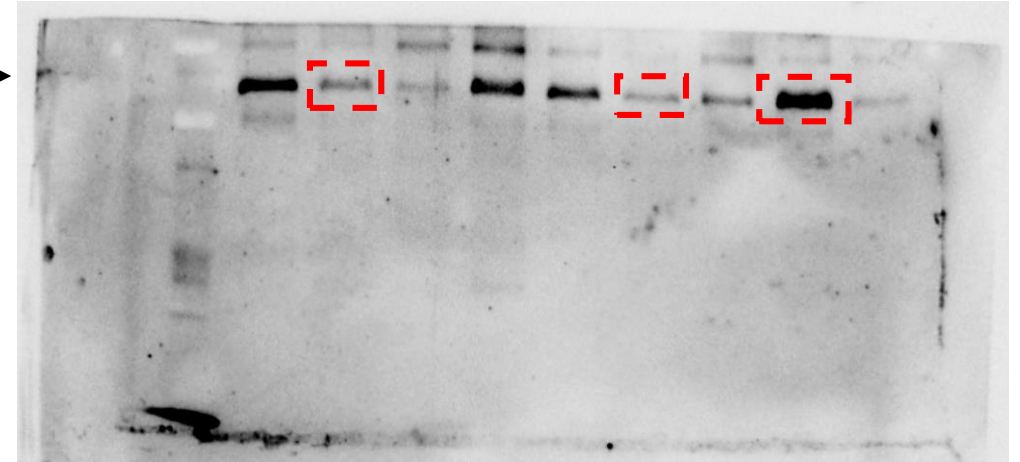

CTL

HF

HF HFSU

GAPDH  
37KDa

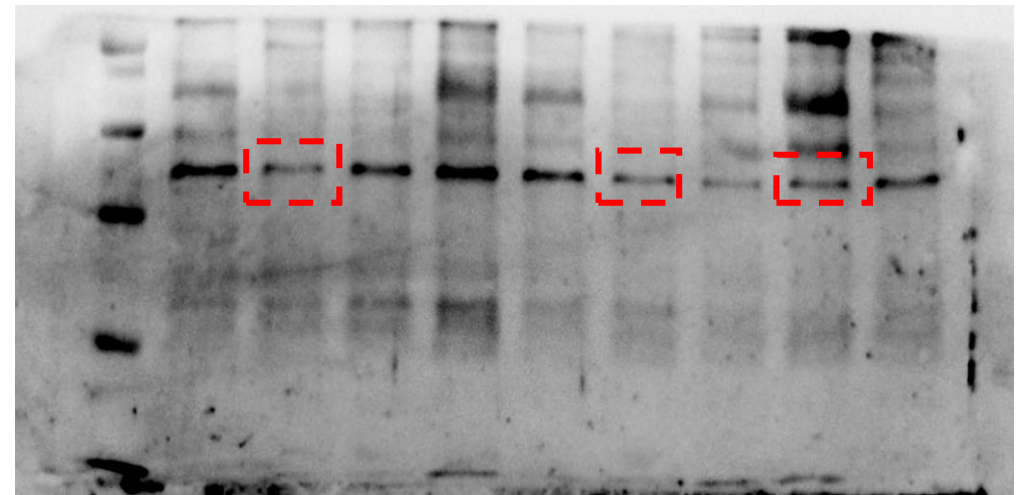

Representative bands  
cropped for the  
manuscript

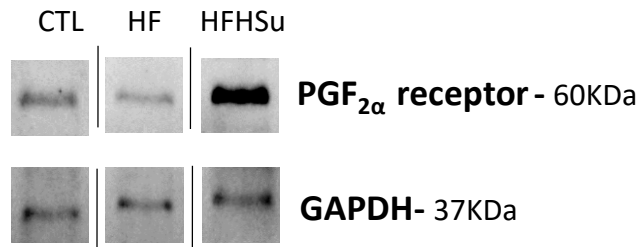

**Figure 3 b**

**PGF<sub>2α</sub> receptor**

**Pulmonary Artery**

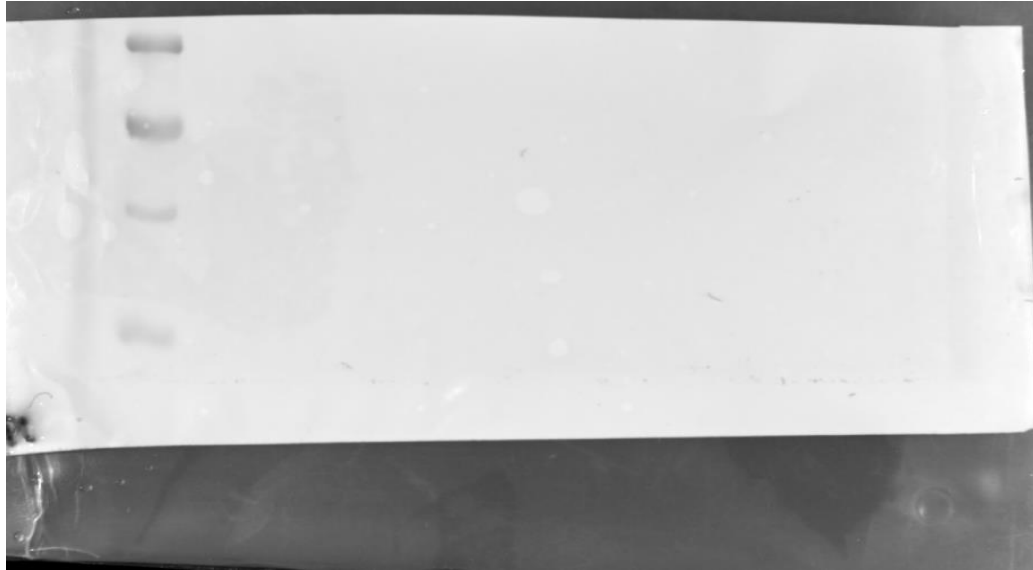

Representative bands  
cropped for the  
manuscript

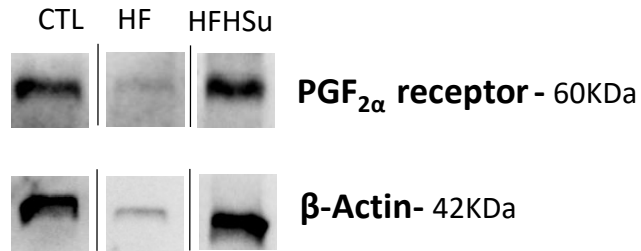

**PGF<sub>2α</sub>  
receptor**  
60KDa

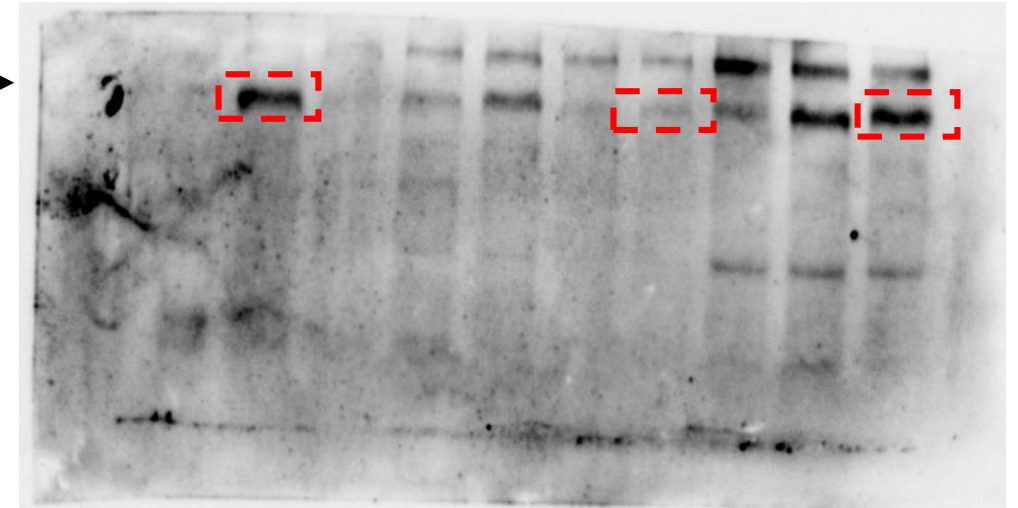

CTL

HF

HF HFSU

**β-Actin**  
42KDa

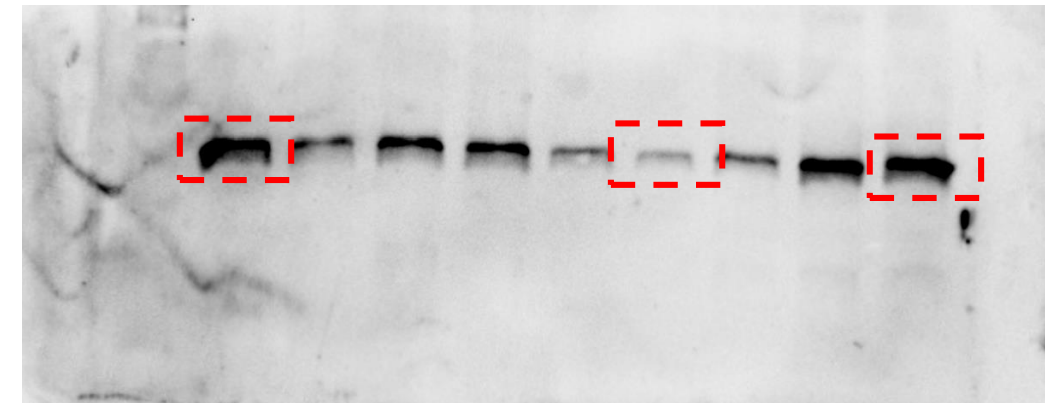

**Figure 4 b**

**iNOS**

**Aorta**

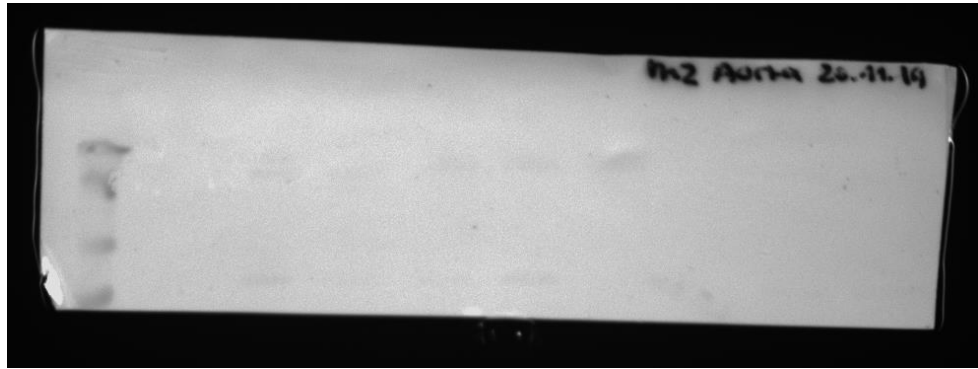

**iNOS**  
130KDa

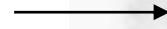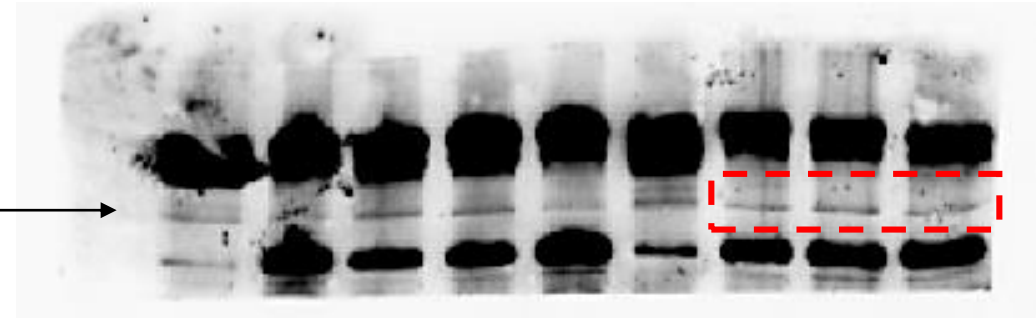

CTL

HF

HFHSu

CTL

HF

HFHSu

CTL

HF

HFHSu

**Calnexin**  
90KDa

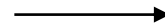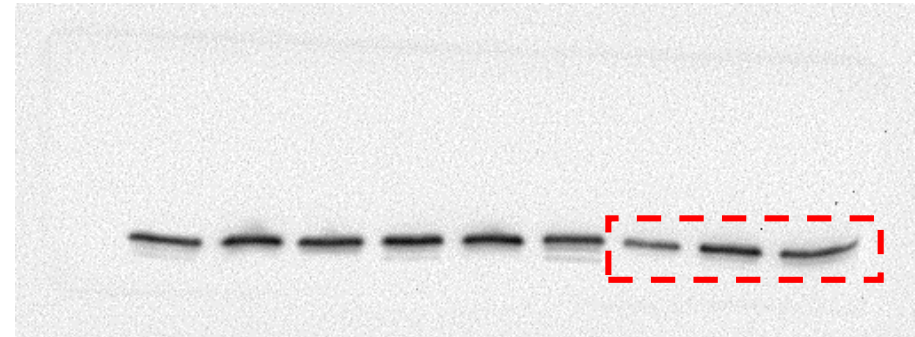



**Figure 4 b**

**iNOS**

**Pulmonary artery**

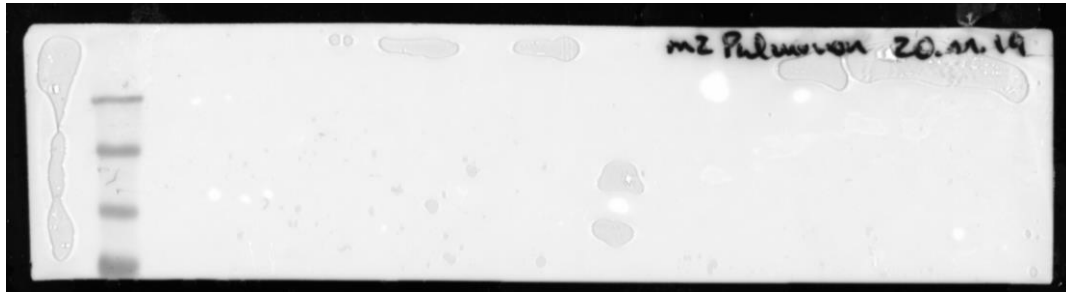

**iNOS**  
130KDa

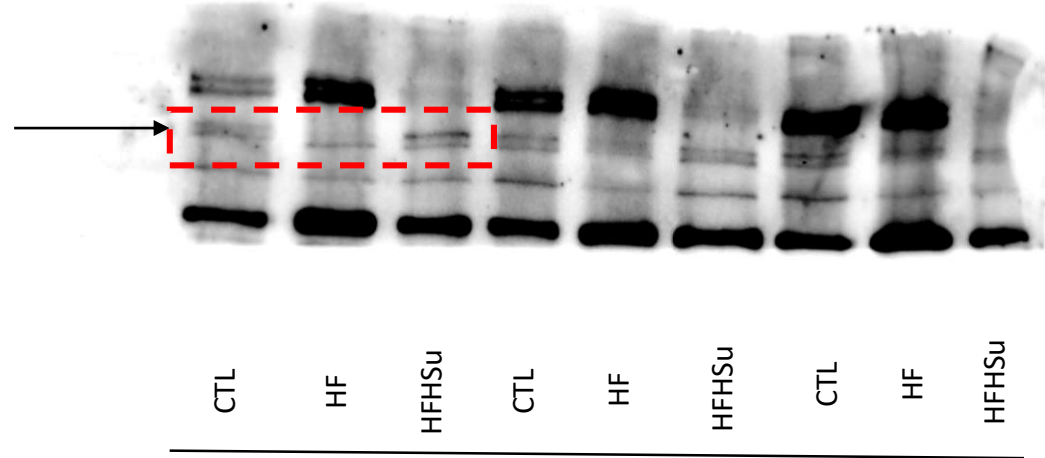

**Calnexin**  
90KDa

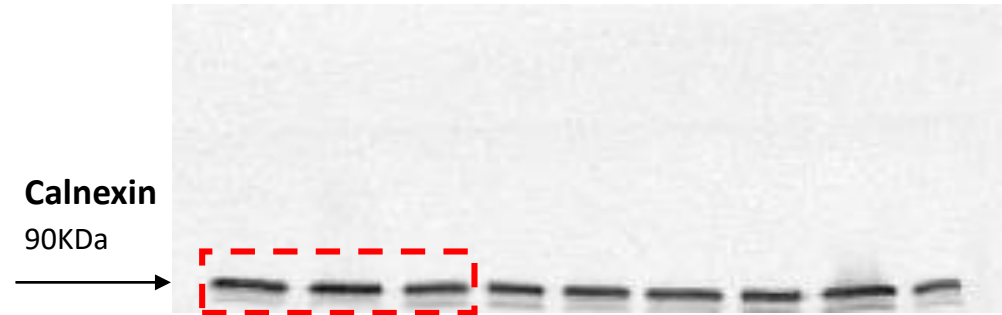

**Figure 4 c**

**eNOS**

**Aorta**

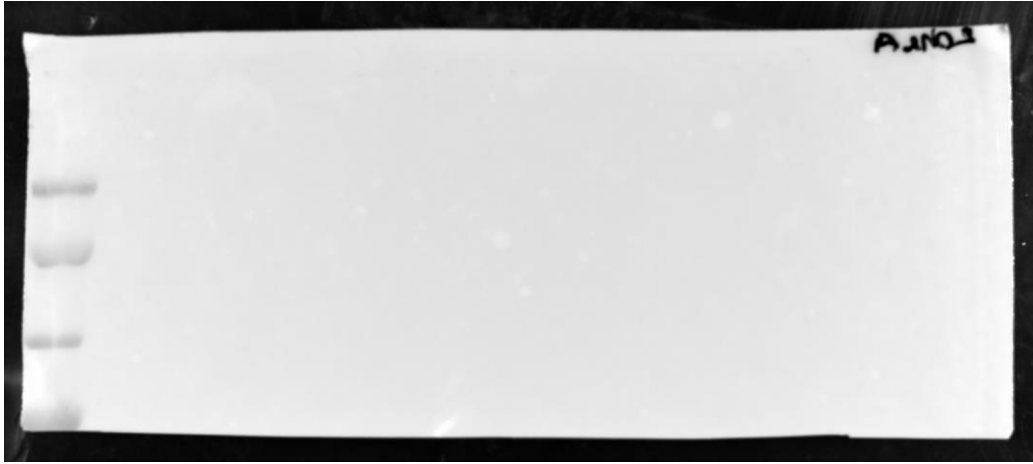

eNOS  
140KDa  
→

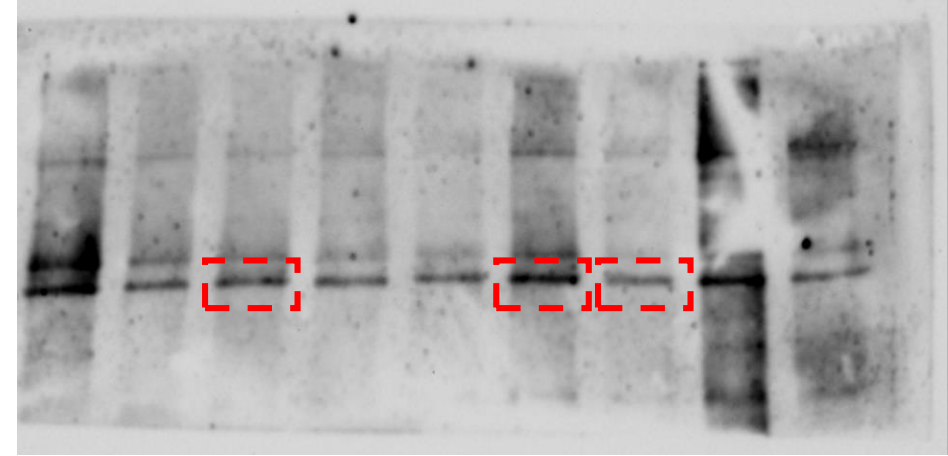

CTL      HF      HF HFSU

Calnexin  
90KDa  
→

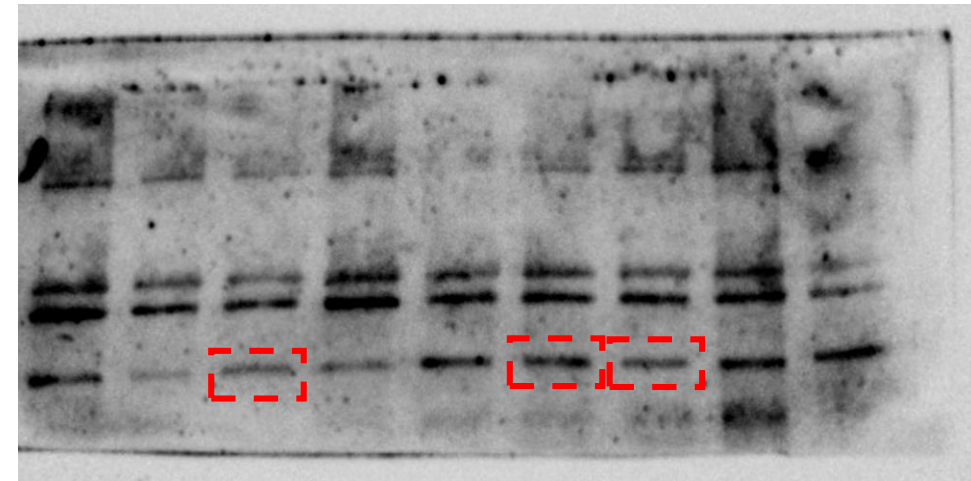

Representative bands  
cropped for the  
manuscript

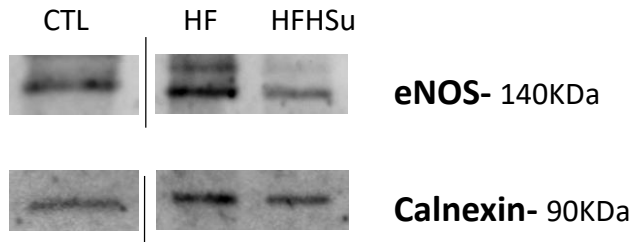

**Figure 4 c**

**eNOS**

**Pulmonary Artery**

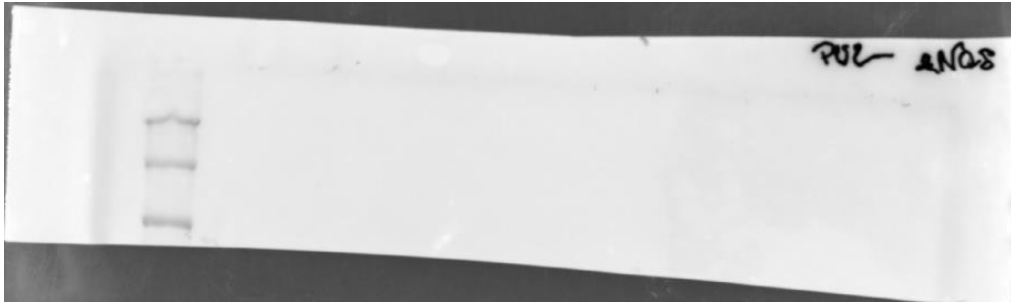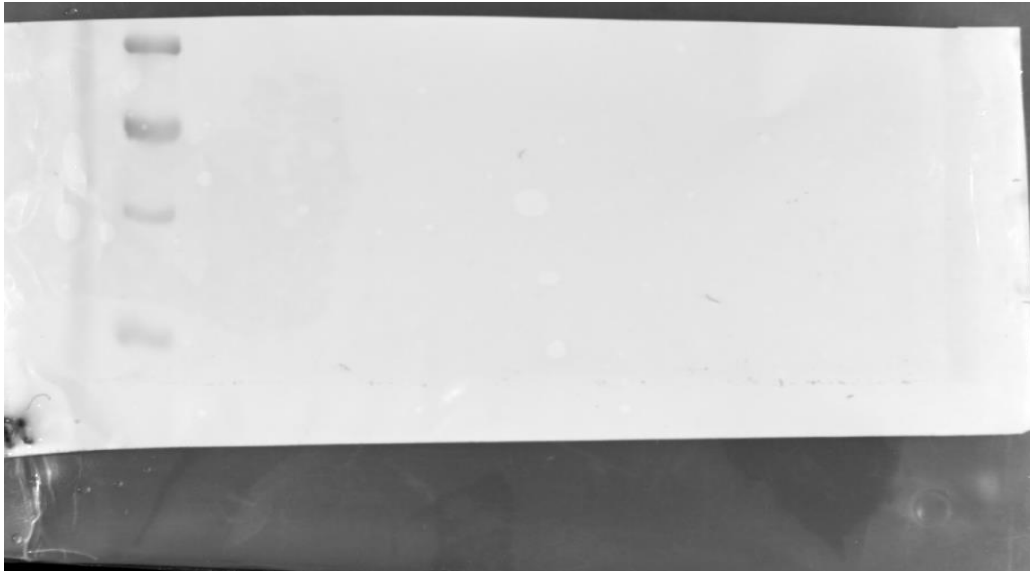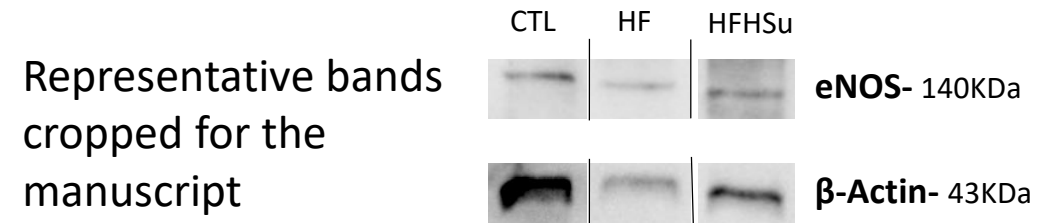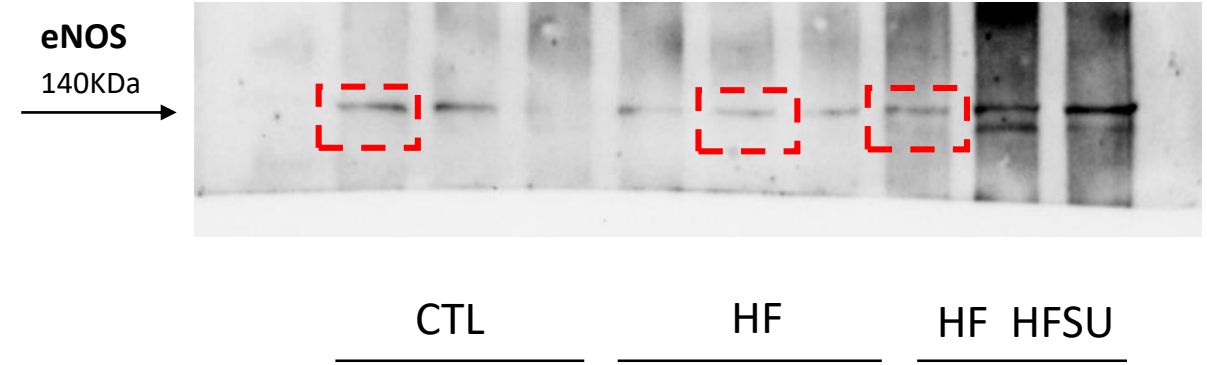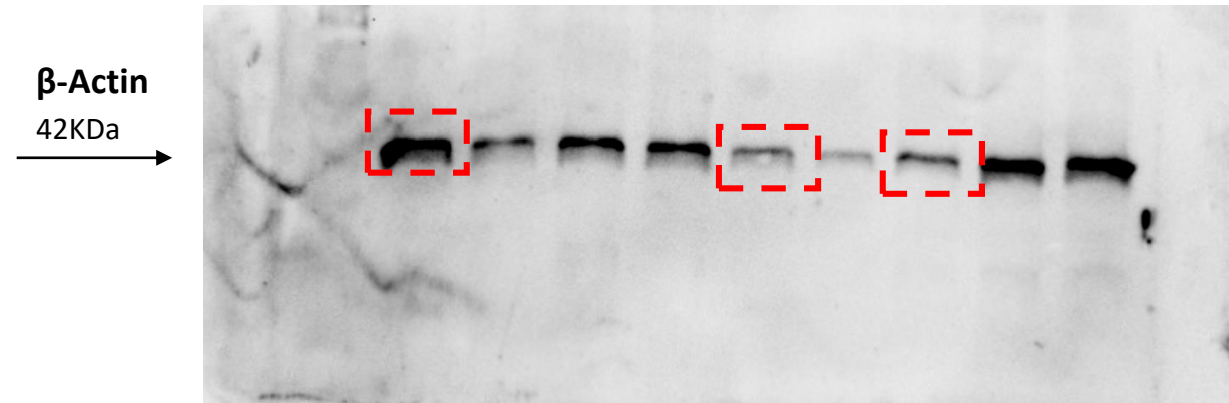

**Figure 5 a**

**AGEs [N<sup>ε</sup>-(carboxyethyl) lysine (CEL)]**

**Aorta and Pulmonary artery**

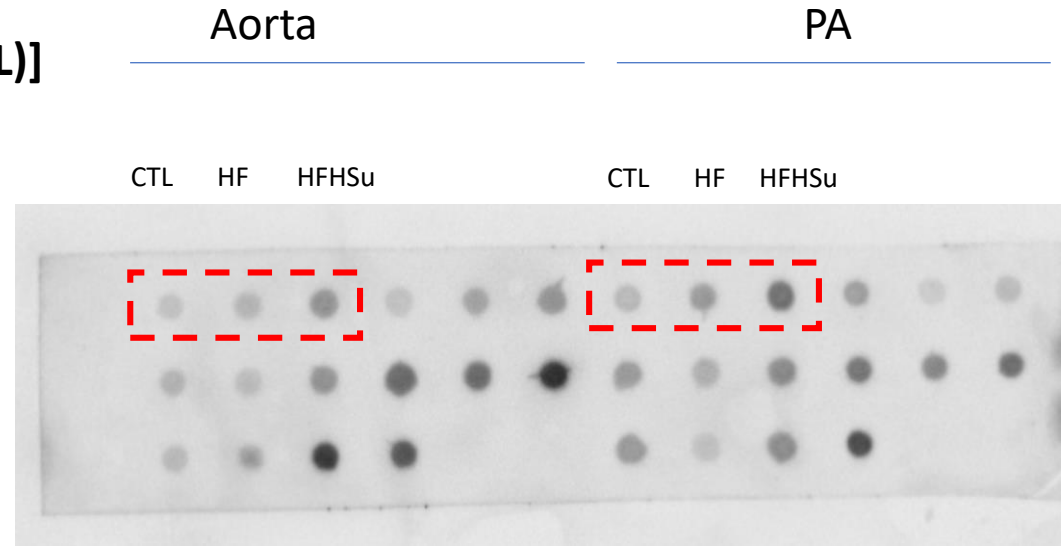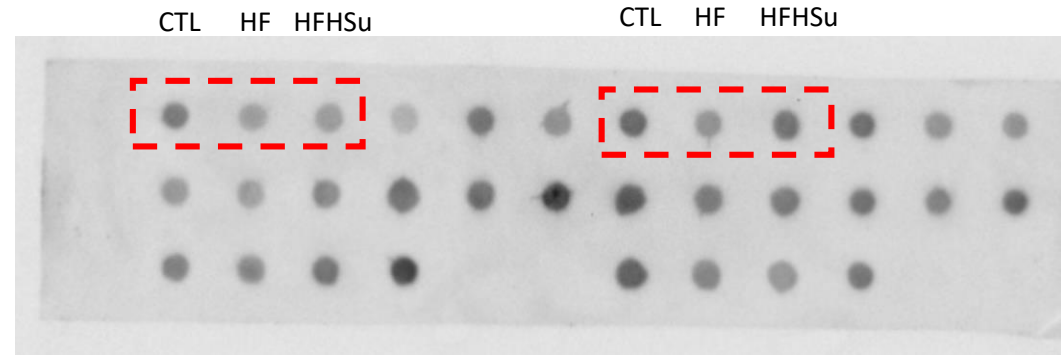

**Figure 5 b**

**AGEs receptor**

**Aorta**

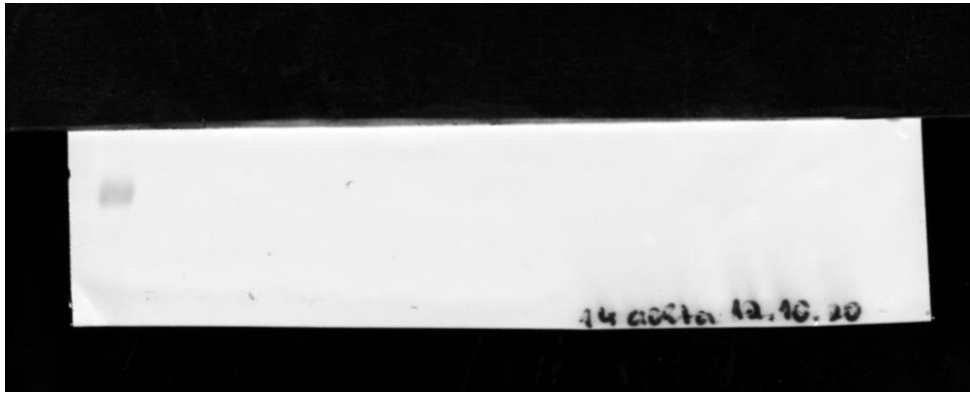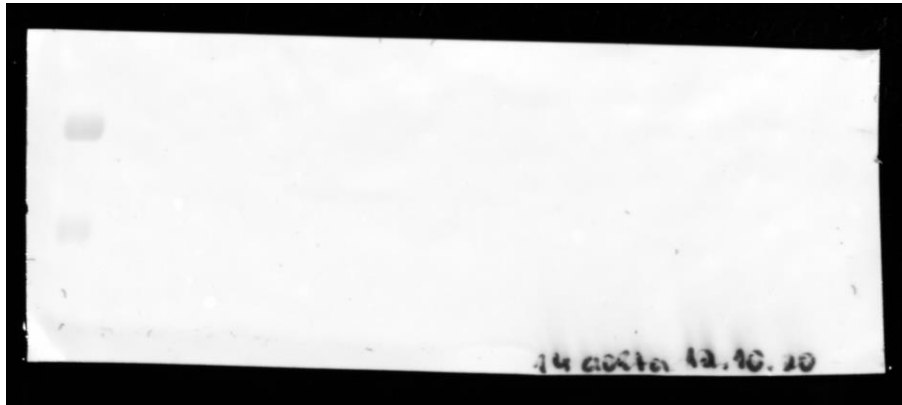

**AGEs  
receptor**  
42KDa

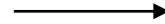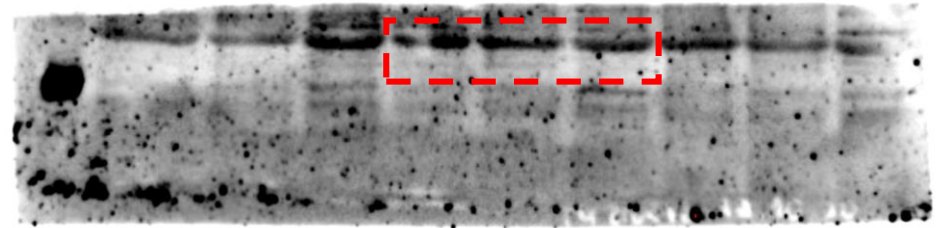

CTL HF HFHSu CTL HF HFHSu CTL HF HFHSu

**GAPDH**  
37kDa

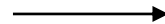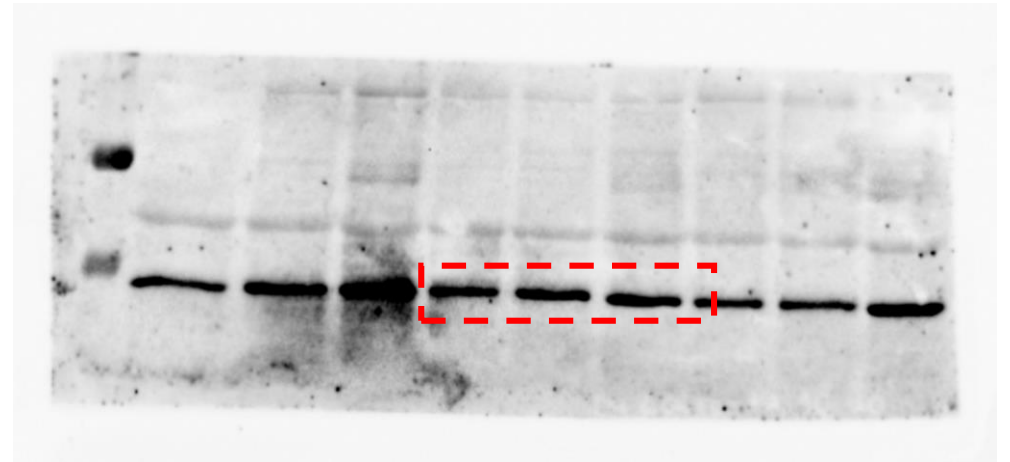

**Figure 5 b**

**AGEs receptor**

**Pulmonary Artery**

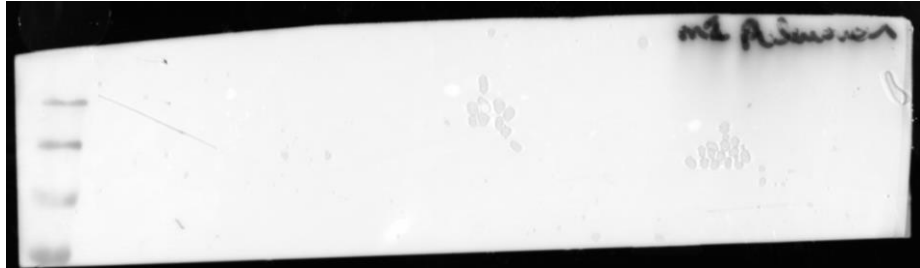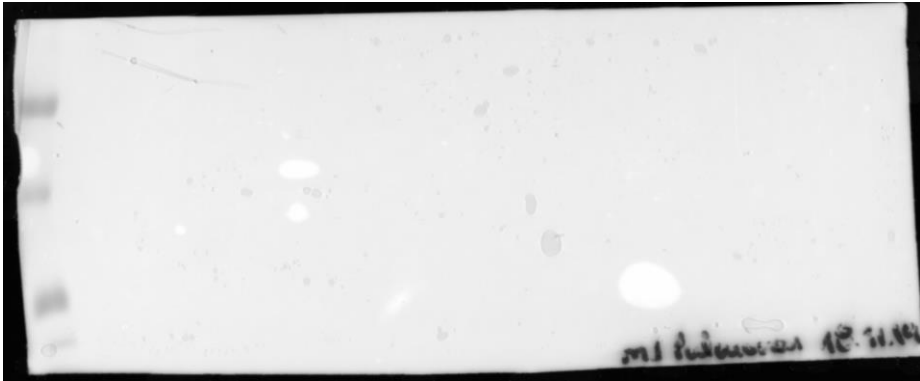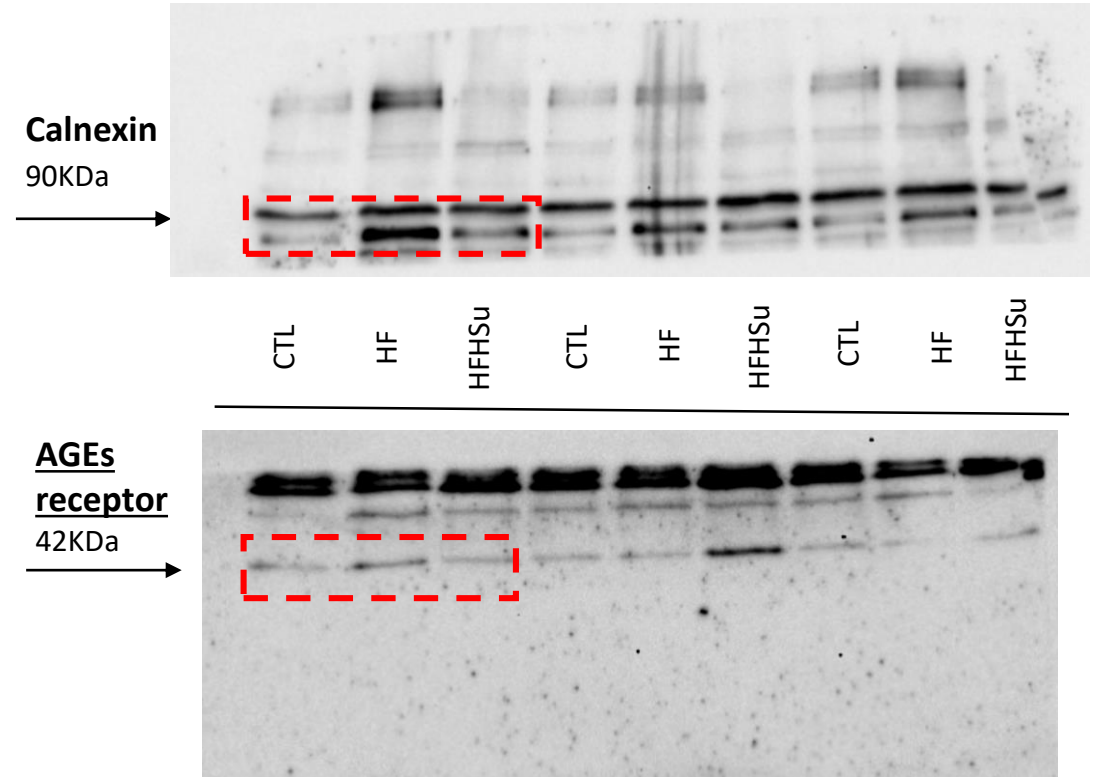

**Figure 6 a**

**IL-1 receptor**

**Aorta**

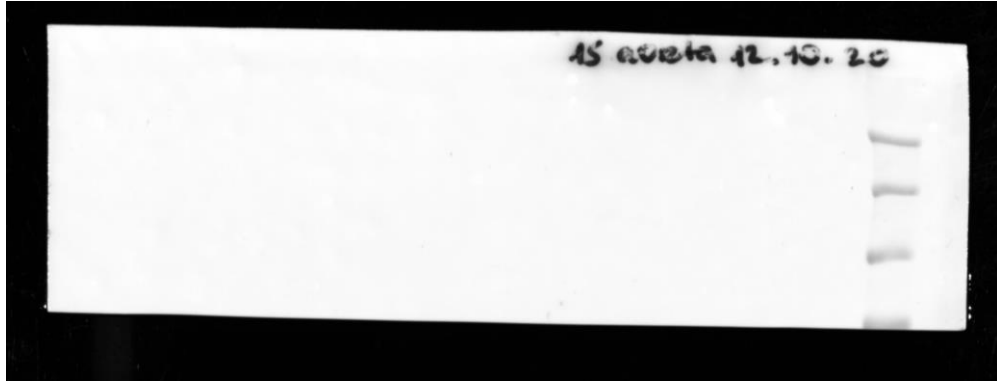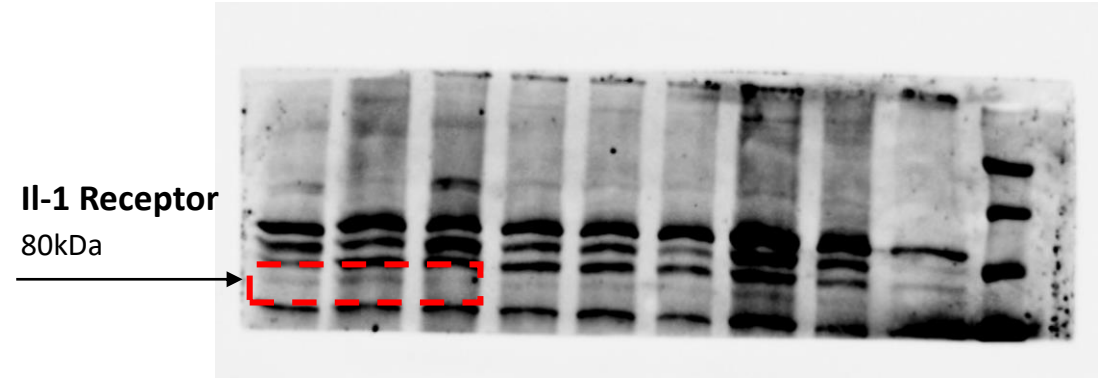

HFHSu HF CTL HFHSu HF CTL HFHSu HF CTL

**GAPDH**  
37kDa

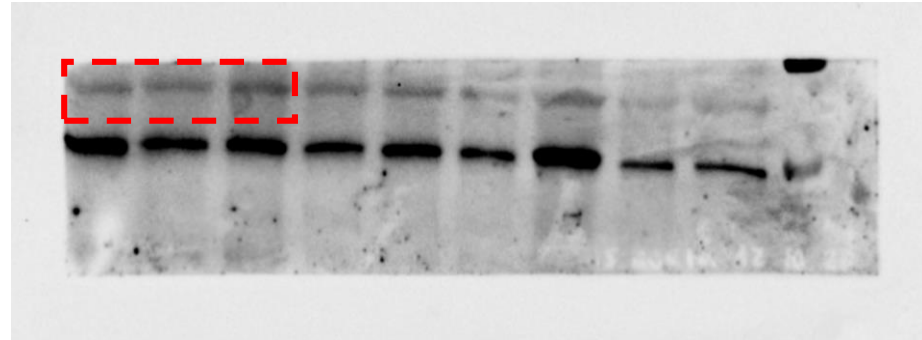

Representative bands  
cropped for the  
manuscript

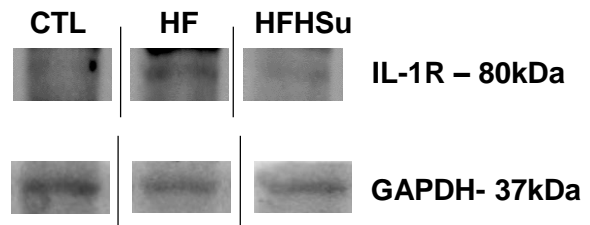



**Figure 6 a**

**IL-1 receptor**

**Pulmonary artery**

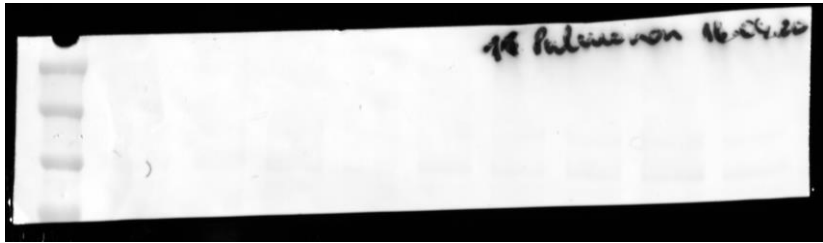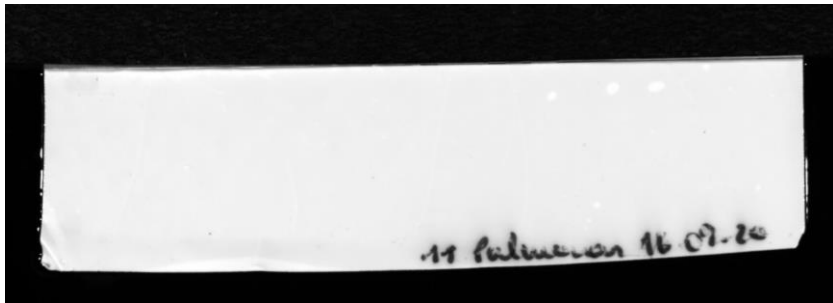

**IL-1 Receptor**  
80kDa

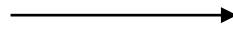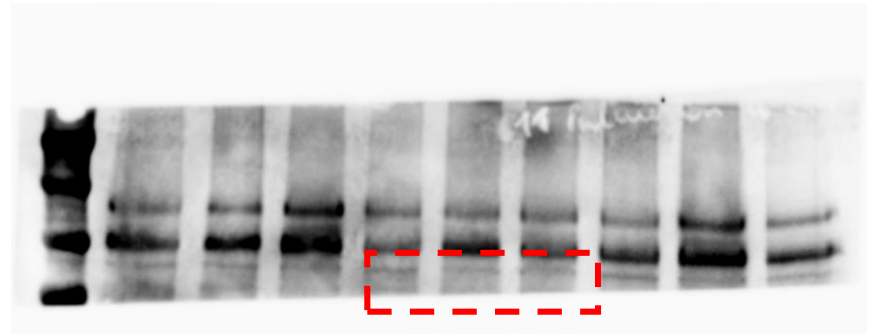

CTL HF HFHSu CTL HF HFHSu CTL HF HFHSu

**GAPDH**  
37kDa

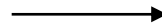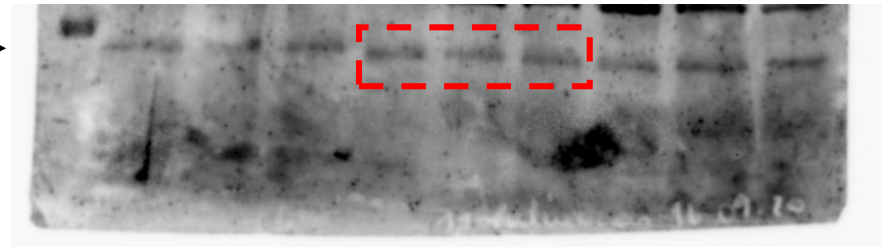



**Figure 6 b**

**IL-6 receptor**

**Aorta**

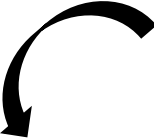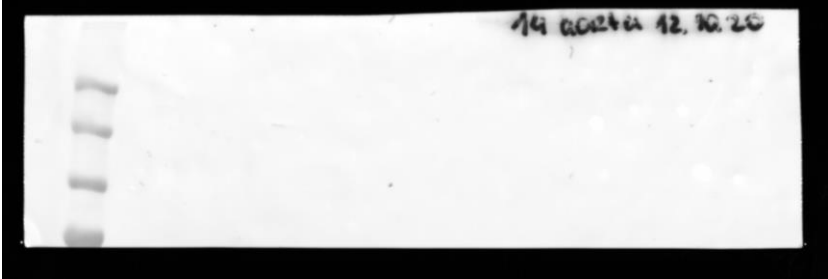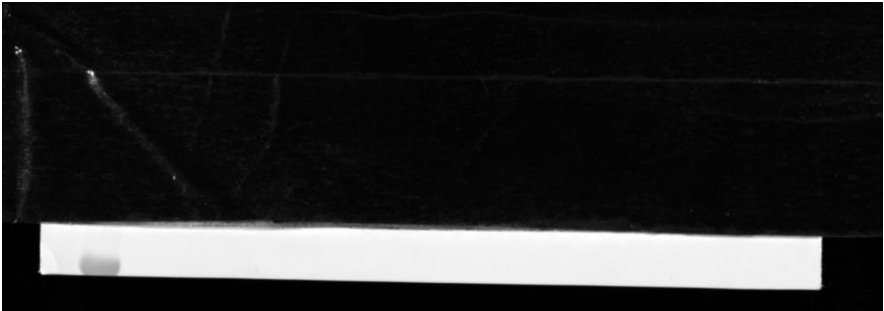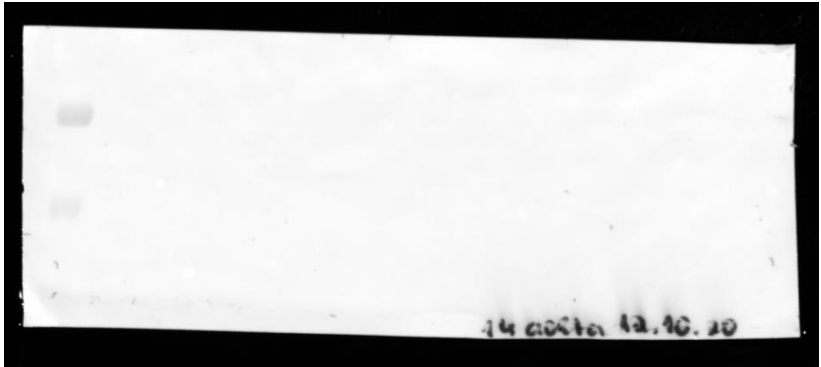

**IL-6 Receptor**

80kDa

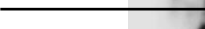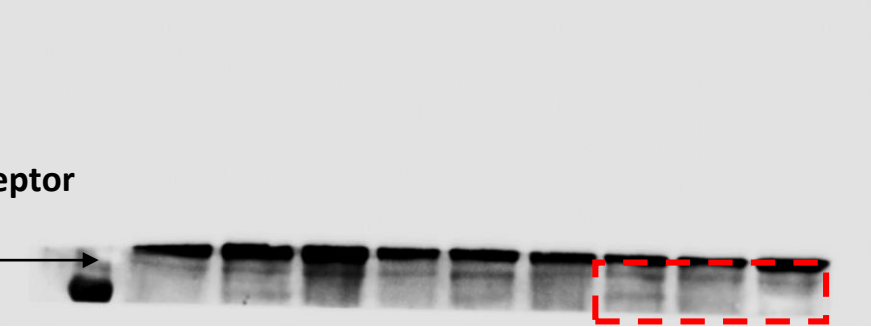

CTL

HF

HFHSu

CTL

HF

HFHSu

CTL

HF

HFHSu

**GAPDH**

37kDa

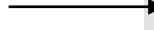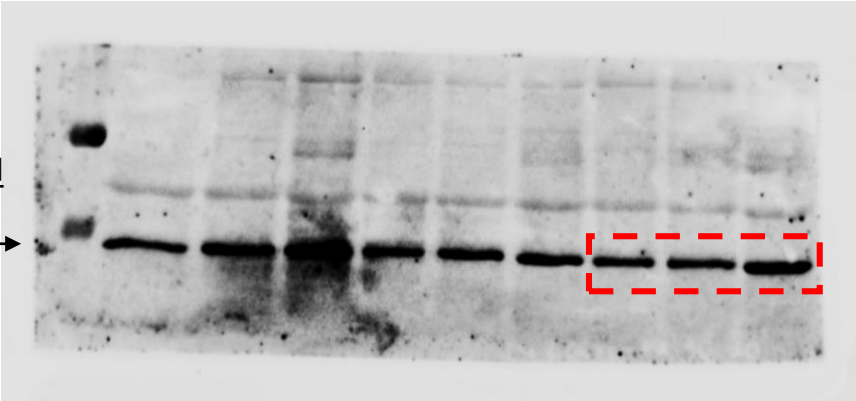

**Figure 6 b**

**IL-6 receptor**

**Pulmonary artery**

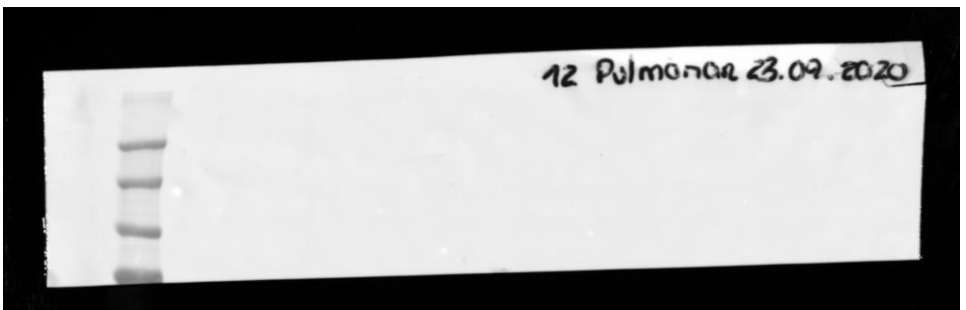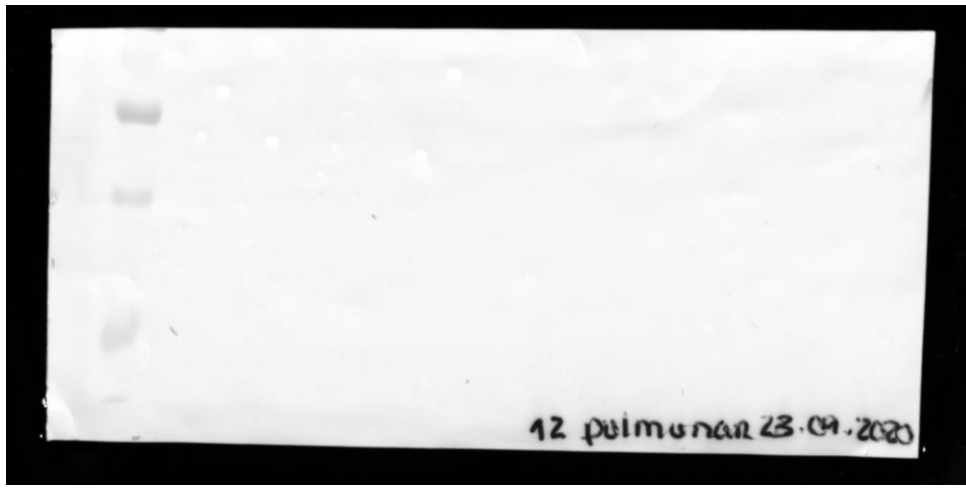

**IL-6 Receptor**  
80kDa  
→

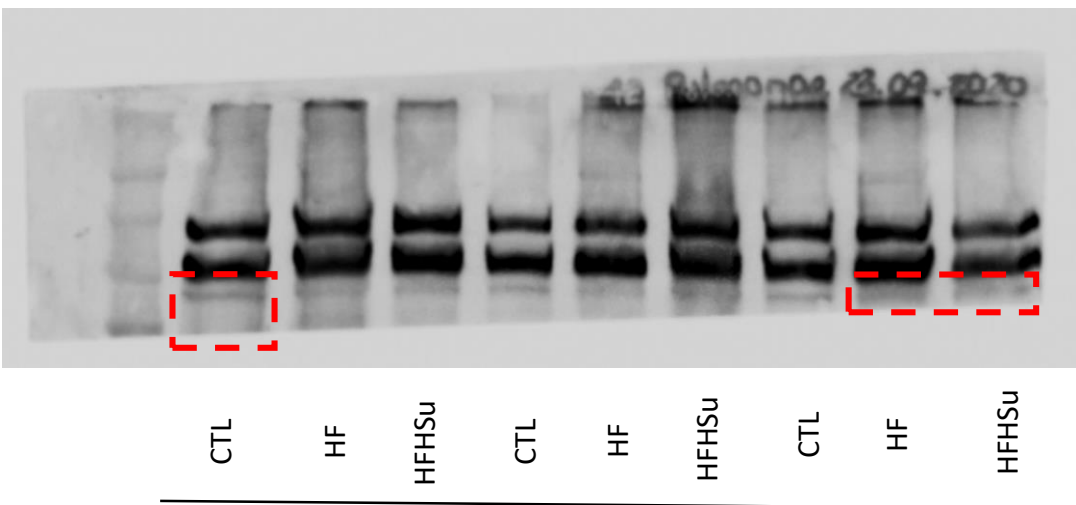

**GAPDH**  
37kDa  
→

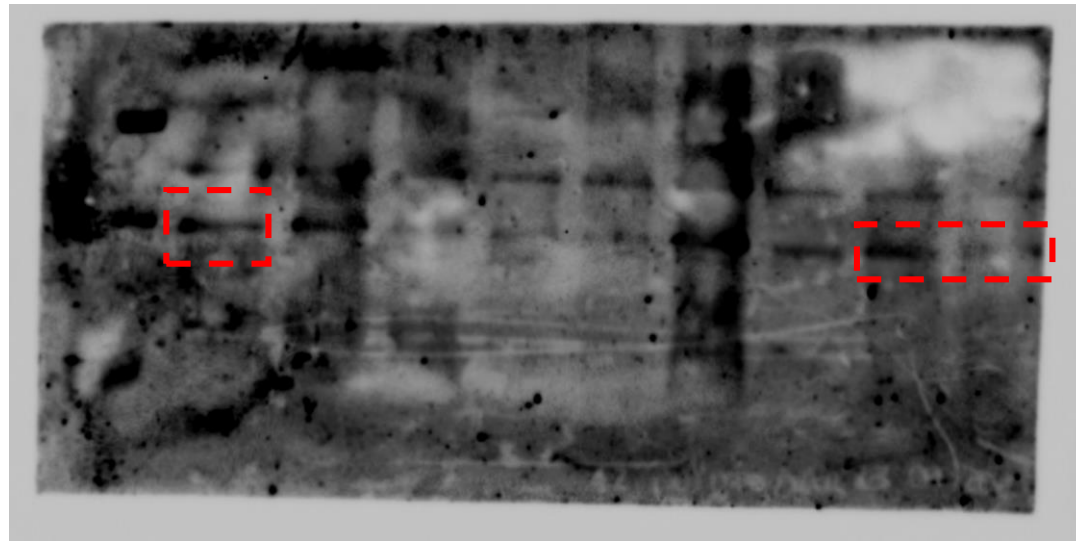

Representative bands  
cropped for the  
manuscript

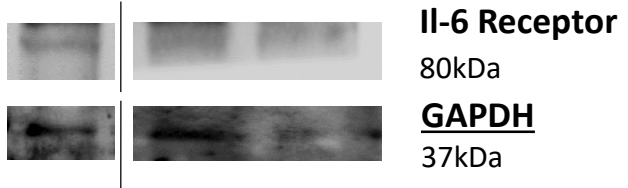

# Figure 7

## Catalase

### Aorta

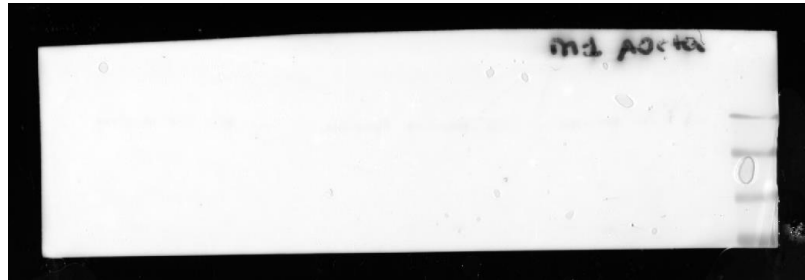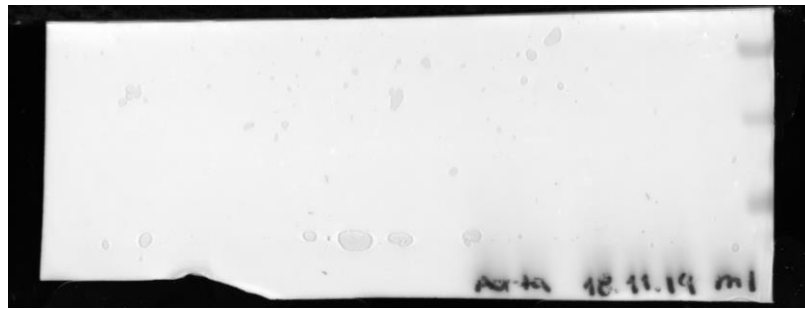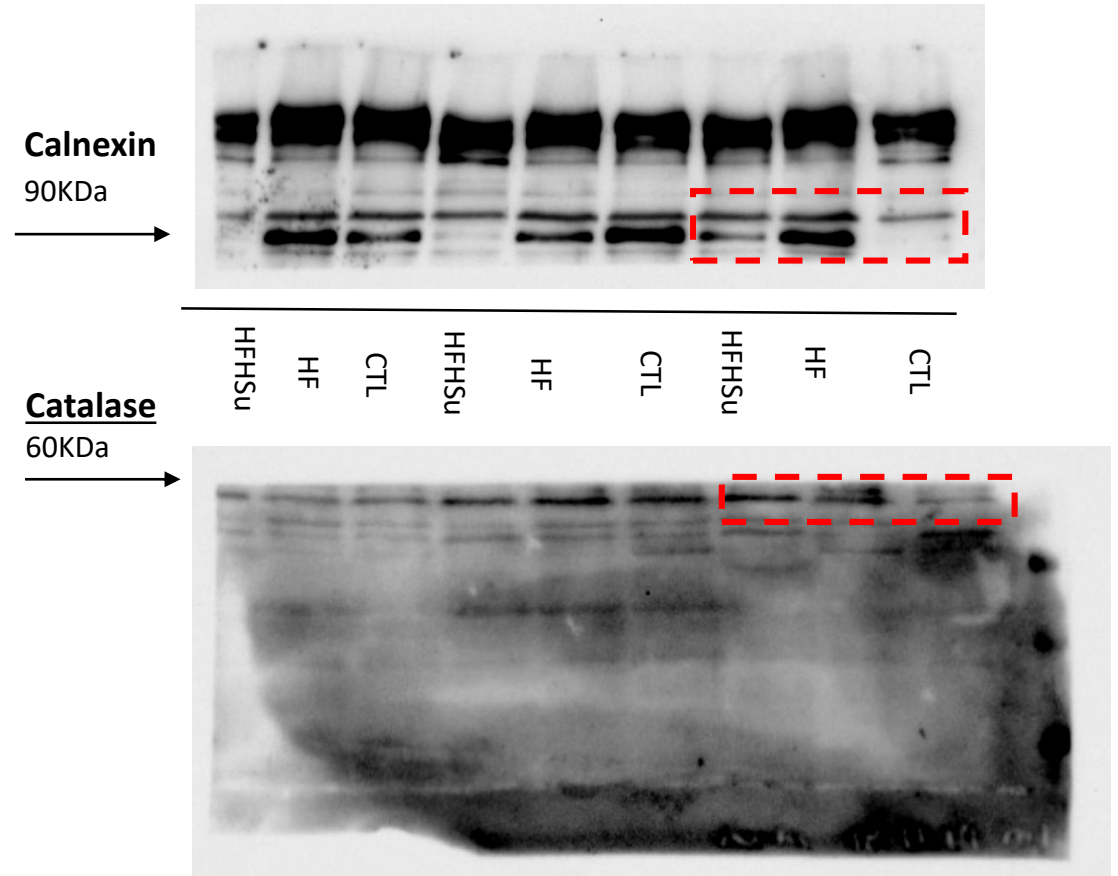

Representative bands  
cropped for the  
manuscript

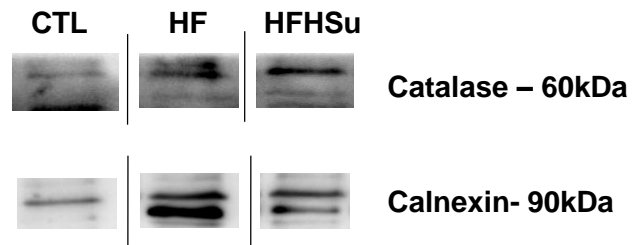

# Figure 7

## Catalase

### Pulmonary Artery

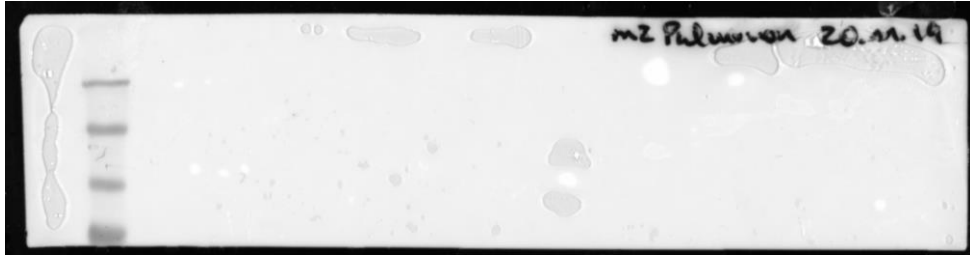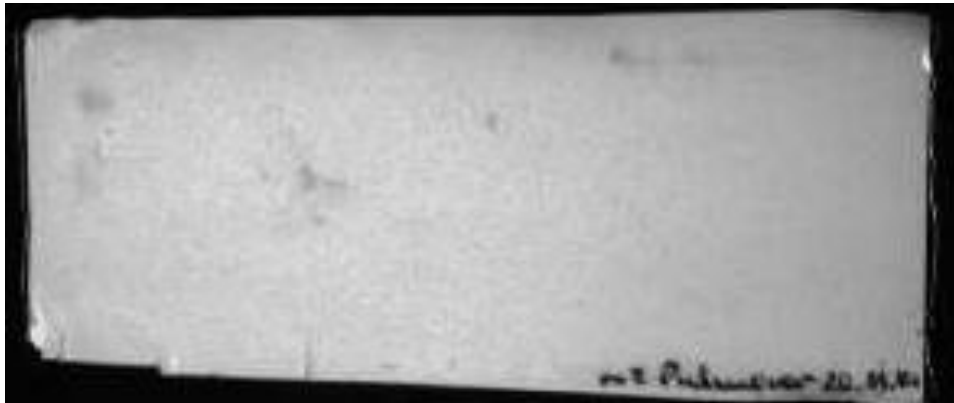

**Calnexin**  
90KDa

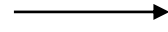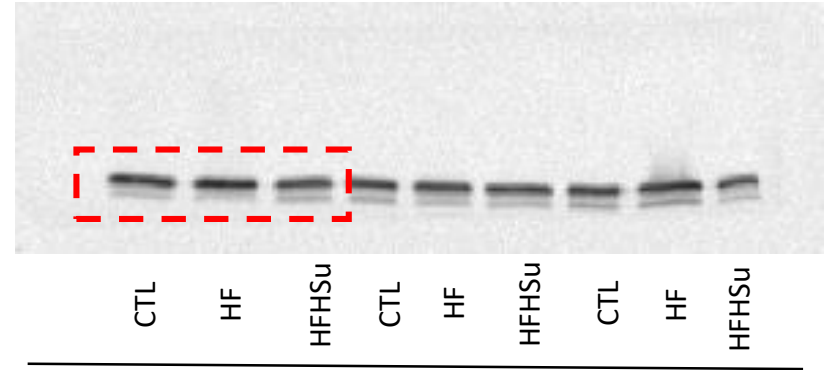

**Catalase**  
60KDa

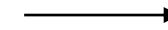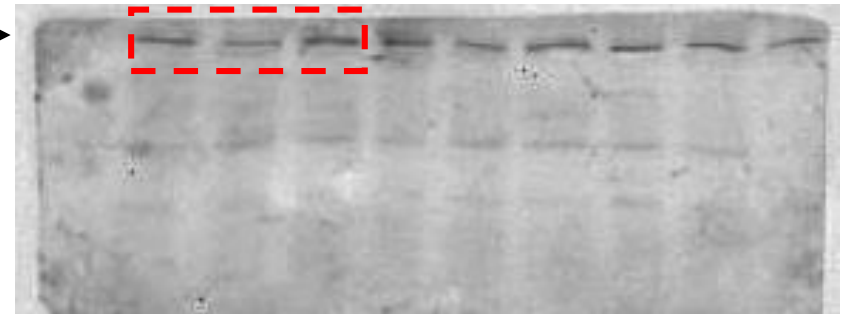

Supplement: 41598_2021_85606_MOESM1_ESM.pdf [file 41598_2021_85606_MOESM1_ESM.pdf]
